# Supplementary material for: Efficient magnetic sorbent for extracting bisphenol A from aqueous samples
Source: Royal Society of Chemistry journal article supplement (doi:10.1039/d5ra04923g), 2025-01-01
Supplement: d5ra04923g1.pdf [file d5ra04923g1.pdf]

## Efficient Magnetic Sorbent for Extracting Bisphenol A from Aqueous Sample

Abdullah Alhendal,<sup>1\*</sup> Jessy Shiju, and Zahoor Ahmad

Department of Chemistry, Kuwait University, P. O. Box 5969, Safat, 13060, Kuwait.

E-mail: [abdullah.alhendal@ku.edu.kw](mailto:abdullah.alhendal@ku.edu.kw).

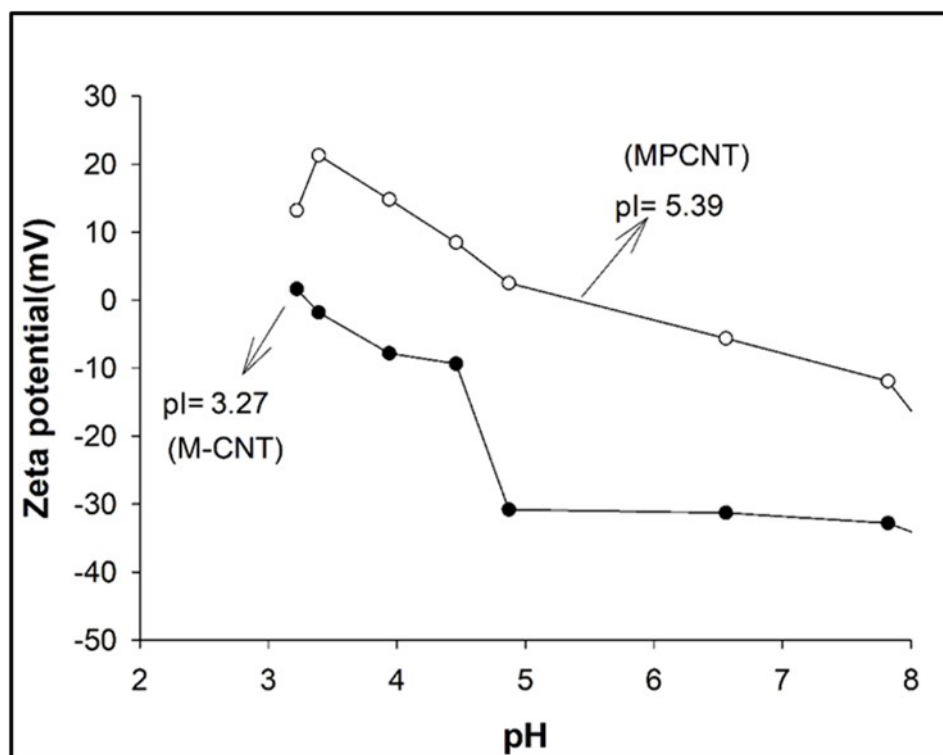

**Figure 1S.** Zeta potentials of magnetic-CNT and magnetic-PCNT in different pH solution.

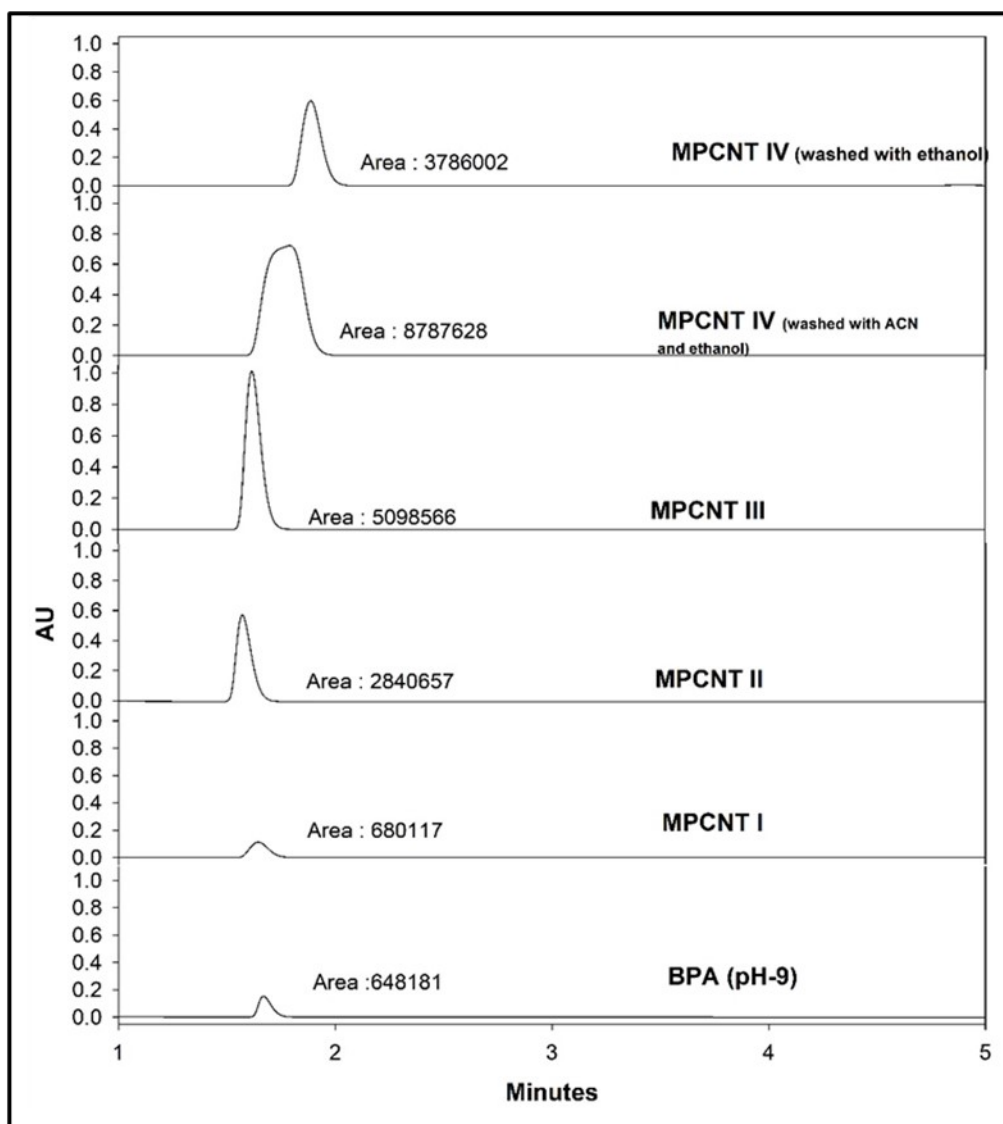

**Figure 2S.** HPLC chromatograms of MPCNT sorbent with different PDMS amounts.

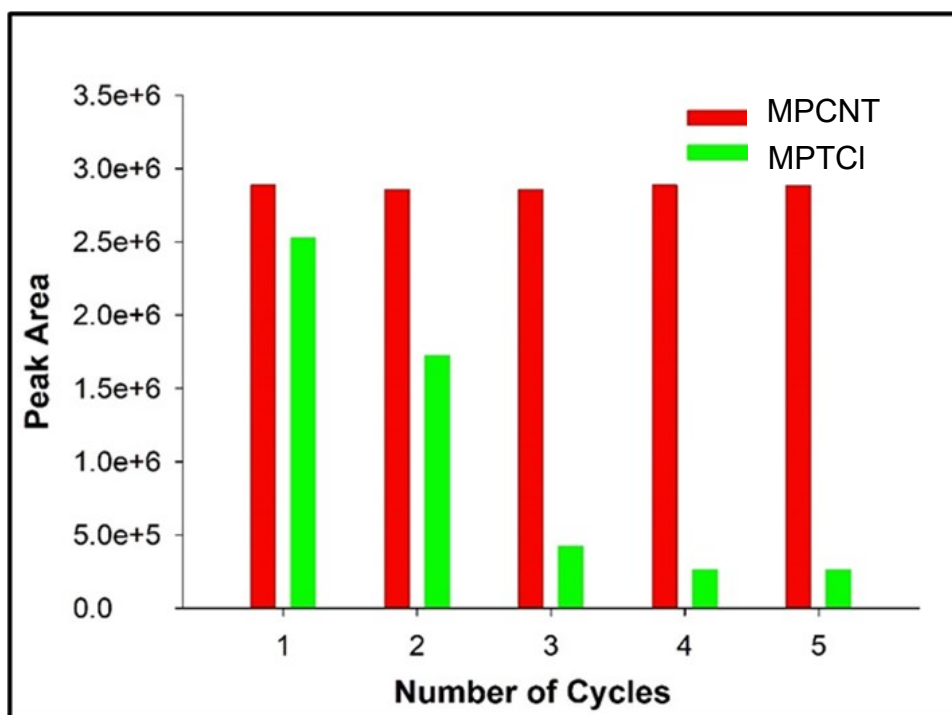

**Figure 3S.** The recycling performance of magnetic-PCNT and magnetic-PTCl for the bisphenol A extraction by the optimized MSPE procedure.

**Table 1S.** Selected variables of the MSPE procedure.

| Parameters                 | MPCNT                                                     | MPTCL                                              |
|----------------------------|-----------------------------------------------------------|----------------------------------------------------|
| Sorbent weight             | 40 mg                                                     | 40 mg                                              |
| Adsorption time            | 30 min                                                    | 30 min                                             |
| Desorption time            | 30 min                                                    | 30 min                                             |
| Adsorption solvent details | 20 mL aqueous BPA solution of pH-9 with 2.5% NaCl         | 20 mL aqueous BPA solution of pH-9 with 2.5% NaCl  |
| Elution solvent details    | 2 mL of 30% acetic acid buffer/acetonitrile (v/v) mixture | 2 mL acetic acid buffer/acetonitrile (v/v) mixture |
| Analyte concentration      | 1 mg L <sup>-1</sup>                                      | 1 mg L <sup>-1</sup>                               |
